# Supplementary material for: Reduction in vehicular emissions attributable to the Covid-19 lockdown in Shanghai: insights from 5 years of monitoring-based machine learning
Source: Copernicus journal article supplement (doi:10.5194/acp-23-10313-2023), 2023-09-15
Supplement: Supplementary file 1 [file acp-23-10313-2023-supplement.pdf]

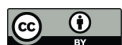

*Supplement of*

## **Reduction in vehicular emissions attributable to the Covid-19 lockdown in Shanghai: insights from 5 years of monitoring-based machine learning**

**Meng Wang et al.**

*Correspondence to:* Qingyan Fu ([qingyanf@sheemc.cn](mailto:qingyanf@sheemc.cn)) and Shun-cheng Lee ([shun-cheng.lee@polyu.edu.hk](mailto:shun-cheng.lee@polyu.edu.hk))

The copyright of individual parts of the supplement might differ from the article licence.

**Table S1. Correlation coefficient R and root mean square error (RMSE in  $\mu\text{g m}^{-3}$ ) between predicted and measured  $\text{NO}_x$  and EC using the random forest model and the multilinear regression model.**

| R (RMSE)      | Random Forest           | Multilinear regression |
|---------------|-------------------------|------------------------|
| $\text{NO}_x$ | 0.89-0.98 (12.94-29.34) | 0.48 (47.6)            |
| EC            | 0.90-0.98 (0.27-0.51)   | 0.45 (0.96)            |

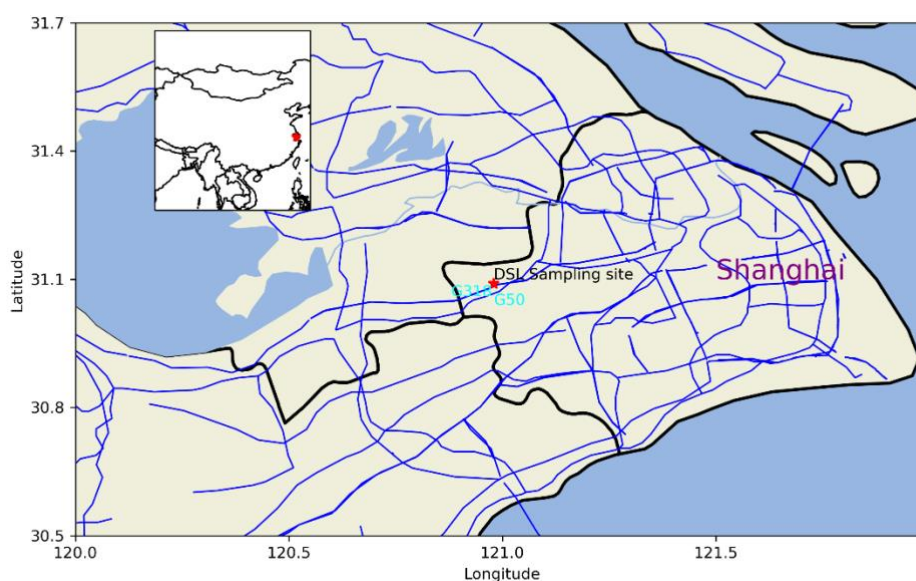

**Figure S1. The location of Dianshan Lake (DSL) supersite in west Shanghai. Blue lines represent roads. The DSL sampling site is approximately 1 km away from the nearest highways (G318 and G50). The Inset shows the location of the sampling site in China. (The map was created using a Python package of Cartopy).**

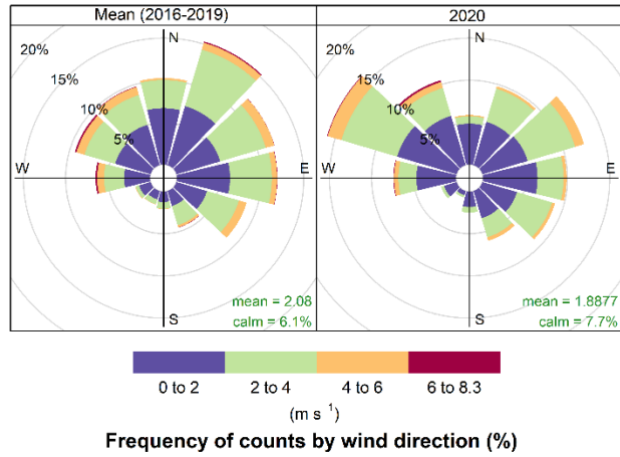

Figure S2. Wind roses for the period between 2016 and 2019 (left), and the year of 2020 with the Covid-19 lockdown (right).

**a** EC seasonal trend

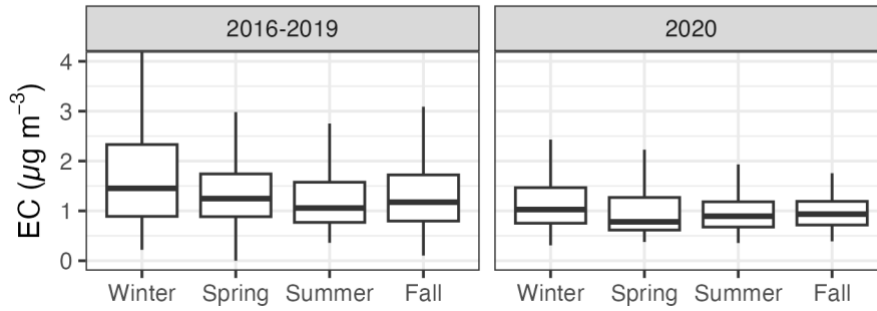

**b** NOx seasonal trend

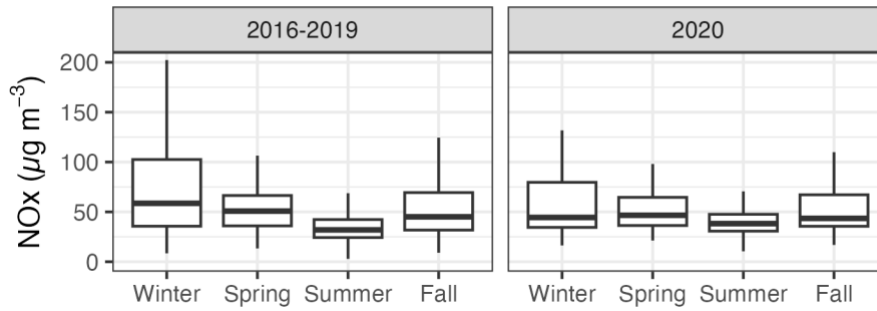

Figure S3. Seasonal variation of EC and NOx for 2016-2019 and 2020.

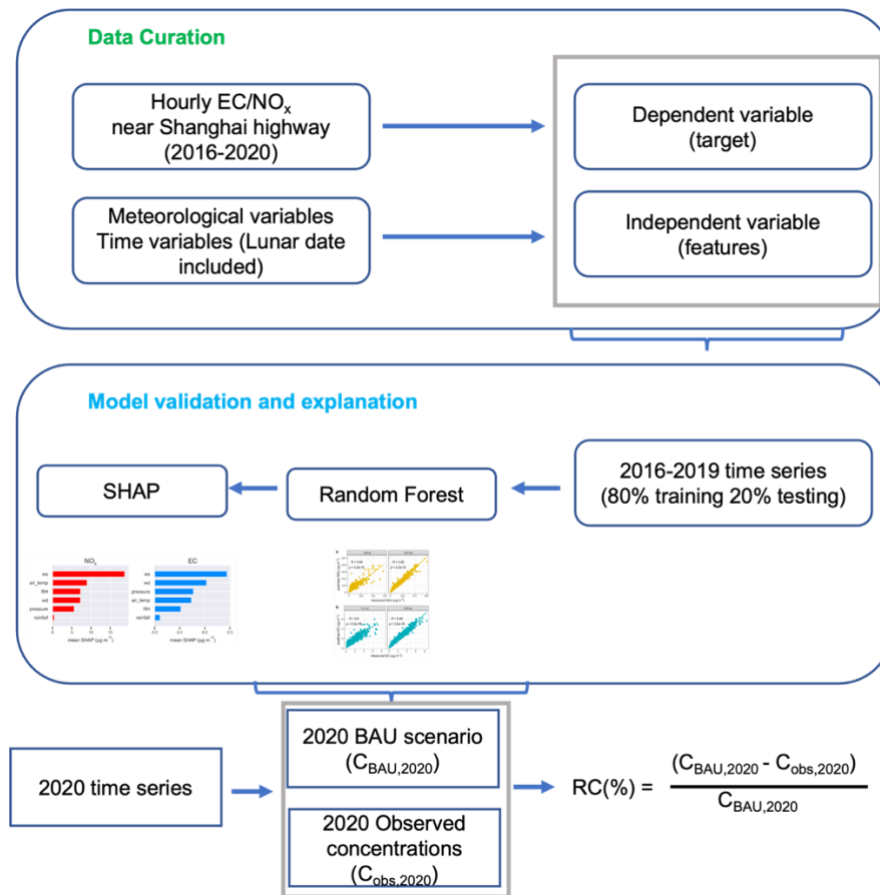

Figure S4. Flow chart of the method. RC standards for relative change in %.

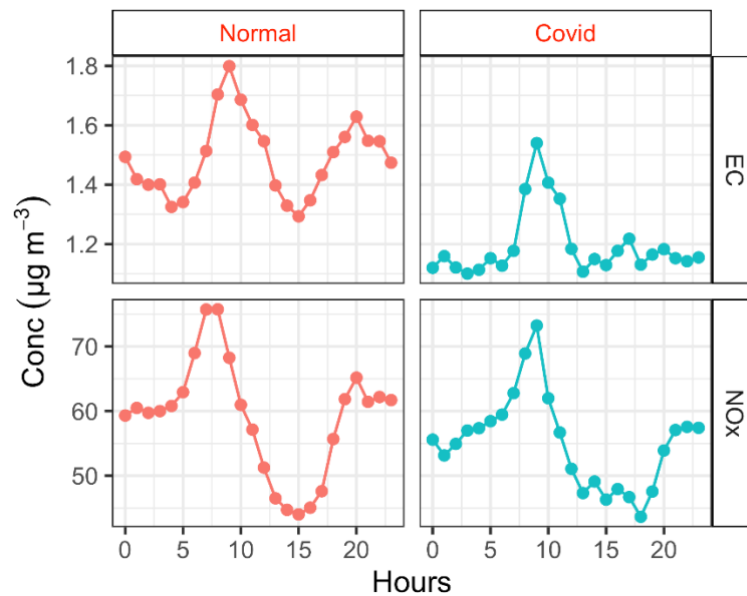

Figure S5. Averaged diurnal cycle of NO<sub>x</sub> and EC during the normal years (2016-2019) and 2020 with Covid.

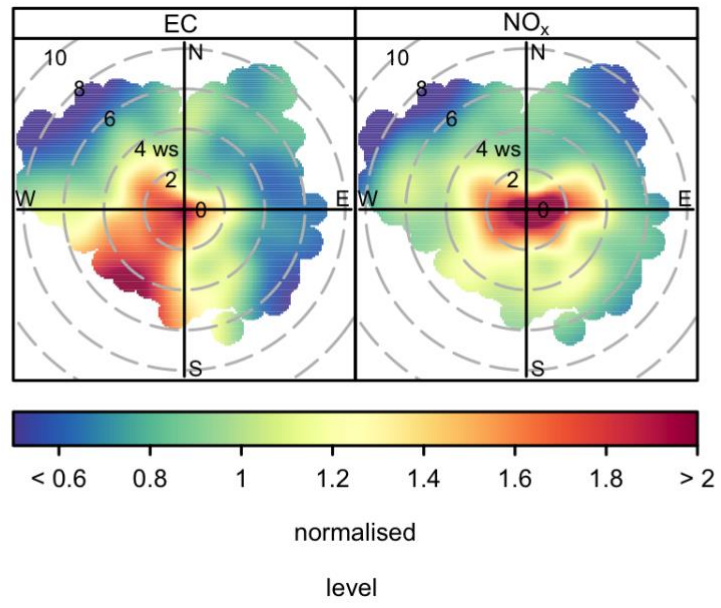

Figure S6. Polar plot of the normalized EC and NO<sub>x</sub> as a function of wind speed and direction.
